# Supplementary material for: A specific group of genes respond to cold dehydration stress in cut Alstroemeria flowers whereas ambient dehydration stress accelerates developmental senescence expression patterns
Source: PubMed Central journal article supplement — J Exp Bot. 2010 May 9;61(11):2905–21. doi: 10.1093/jxb/erq113 (PMC2892140; doi:10.1093/jxb/erq113), 2010-05-09
Supplement: erq113_1.pdf [file erq113_1.pdf]

**Supplementary Table 3: primers used for RT-PCR analysis**

---

| <b>Systematic</b> |                       |                       |
|-------------------|-----------------------|-----------------------|
| <b>name</b>       | <b>Forward</b>        | <b>Reverse</b>        |
| <b>17.h22</b>     | TCACCATGTCTTCCA CTGTC | TTGCAGTTTGGGTCG TTC   |
| <b>15.b11</b>     | AAAACATGGCACGATAGAAA  | CGGGGTCCTTCAAATACTCA  |
| <b>15.h22</b>     | GGGCGTCTGCAACTACAAGT  | GCAAGGAAGATCAGGCTTTTC |
| <b>10.b16</b>     | CCGACATTTTCCCTGAGATG  | GCTCCTGTTTCACCAGATCC  |
| <b>5.m20</b>      | AAGGTTGCTGGGCAGTTCCA  | ATCTAGCCCCACGAGTCAGA  |
| <b>10.d17</b>     | AGGGGCGTCTCTACCAAGTT  | CAGGCATCTCATT TCCCATT |
| <b>13.i2</b>      | ACCCAAATCAGCAGCAAGTC  | AAGCCAACCAGGCATGTAAC  |
| <b>13.i2</b>      | GCACGAGGAAGAGCTTGAAC  | ATCCCAGACTTGCTGCTGAT  |
| <b>10.b7</b>      | CAACCAACCATCTGTCATGC  | ATCTAGCCCCACGAGTCAGA  |

---
